# Supplementary material
Source: Springer Nature journal article supplement (https://www.springermedizin.de/resource/supplementary/12879_2013_3151_MOESM5_ESM.pdf/9446052)
Supplement: MOESM5 [file 9446052]

Clinical sign  
or symptom

SM

Proportion, by infection status

0%

20%

40%

60%

80%

100%

Sorethroat

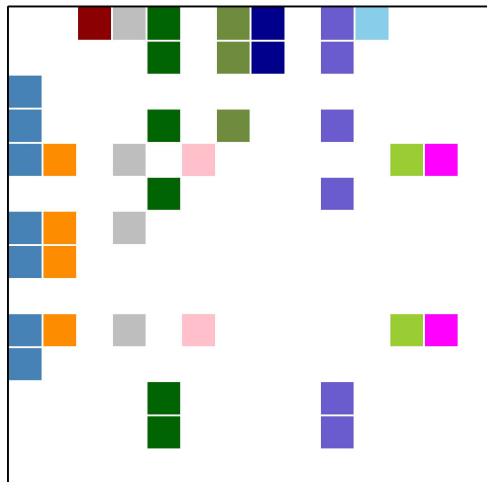

Flu A (pH1N1)

Flu A (H3N2)

Flu A (Unknown)

Flu B

CA/Echo

Entero

Rhino

Adeno E

Adeno B

Corona OC43

Corona NL63

Corona 229E

hMPV

Parainfluenza 3

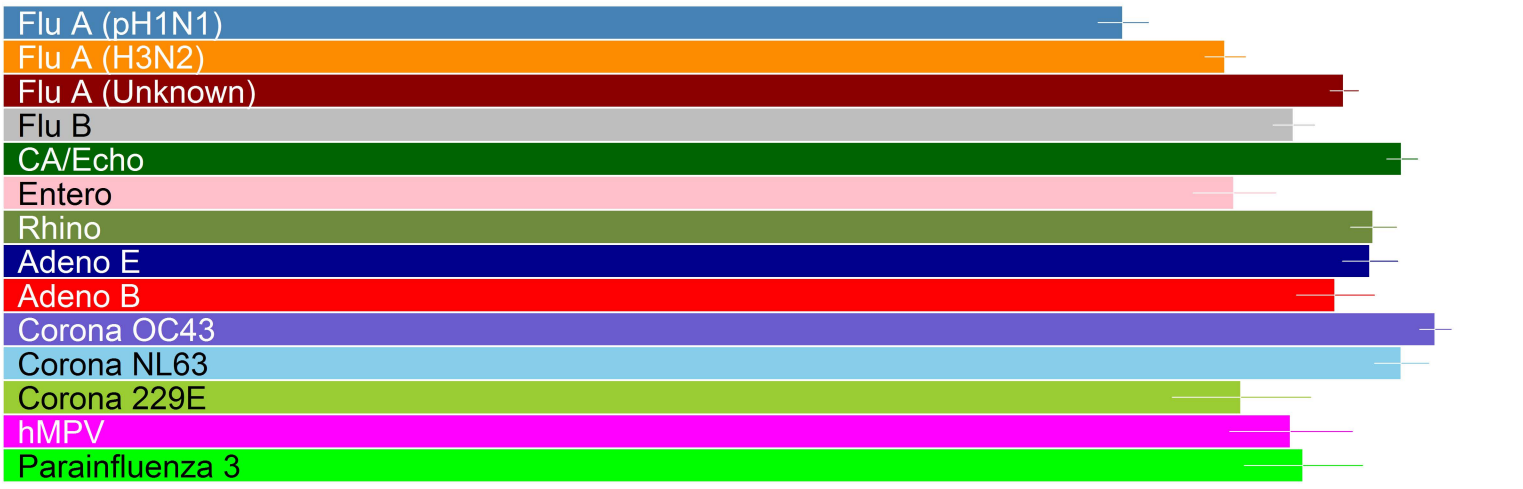

Clinical sign  
or symptom

SM

Proportion, by infection status

0%

20%

40%

60%

80%

100%

Chills Rigors

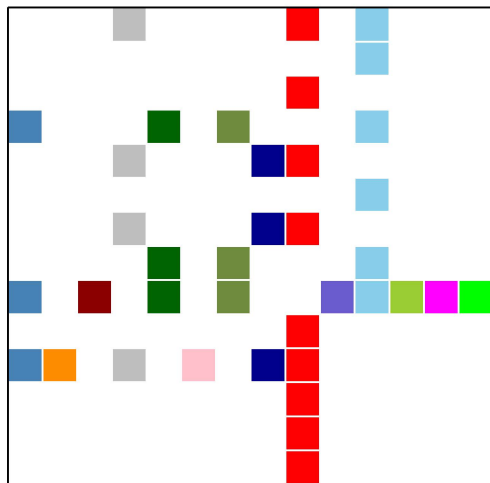

Flu A (pH1N1)

Flu A (H3N2)

Flu A (Unknown)

Flu B

CA/Echo

Entero

Rhino

Adeno E

Adeno B

Corona OC43

Corona NL63

Corona 229E

hMPV

Parainfluenza 3

Clinical sign  
or symptom

SM

Proportion, by infection status

0% 20% 40% 60% 80% 100%

Headache

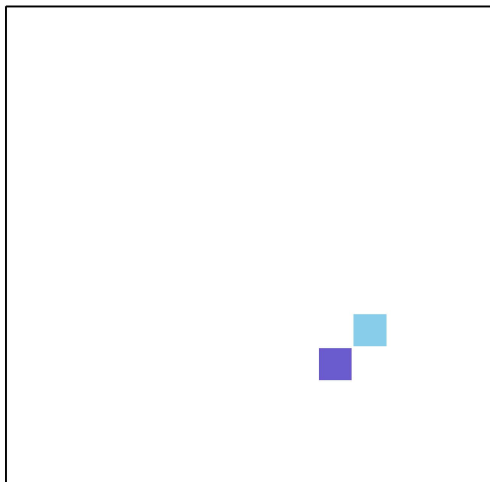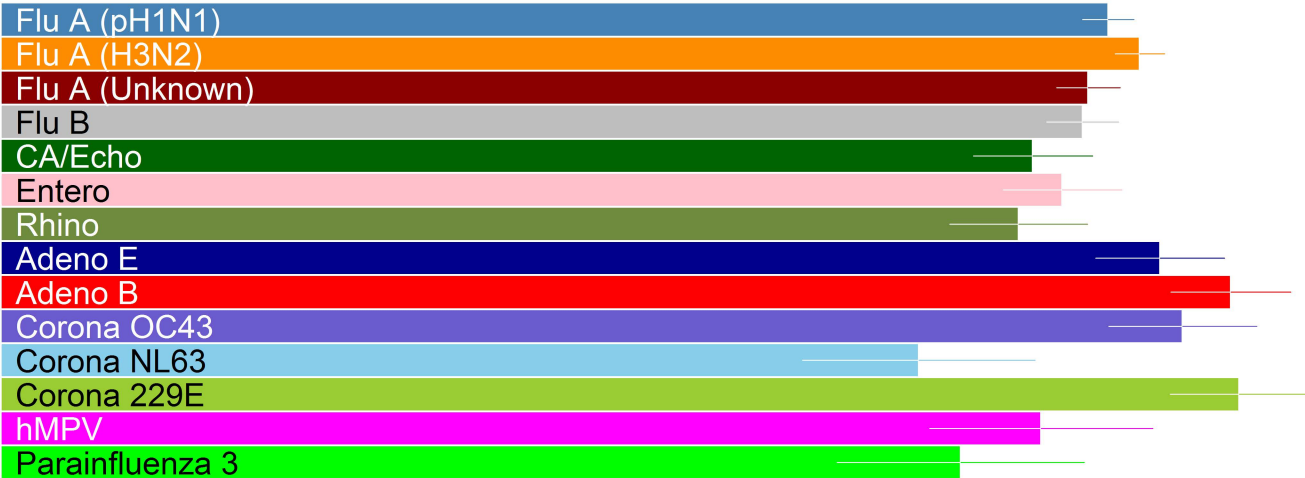

Clinical sign  
or symptom

SM

Proportion, by infection status

0%

20%

40%

60%

80%

100%

Fever  $\geq 37.8^{\circ}\text{C}$

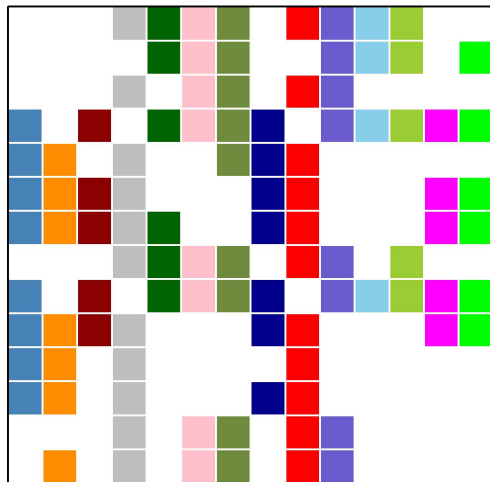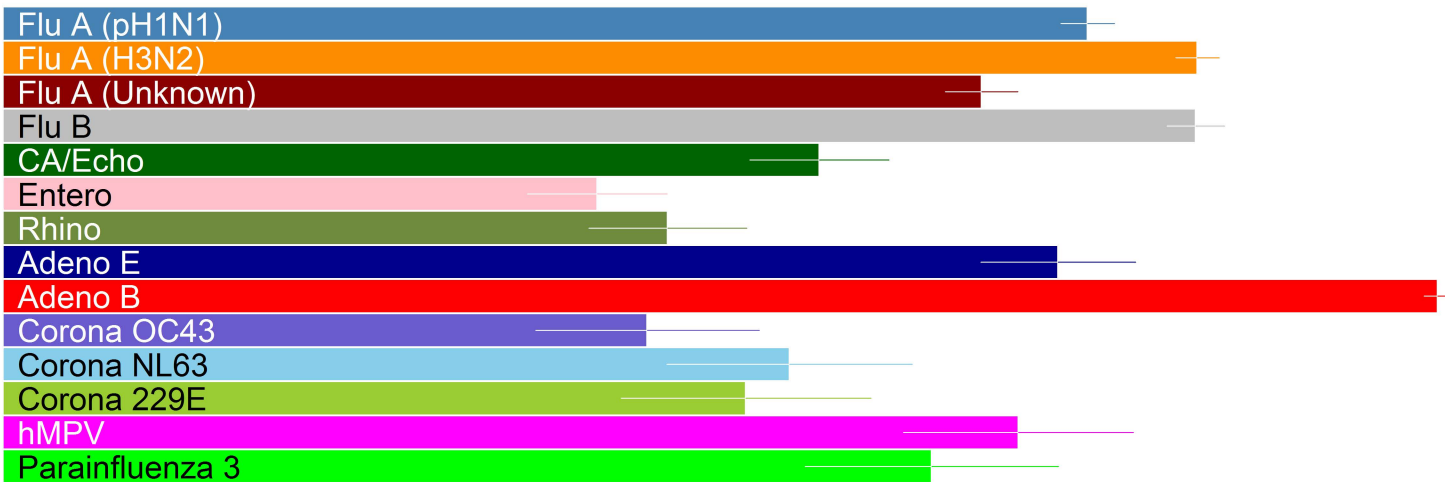

Clinical sign  
or symptom

SM

Proportion, by infection status

0%

20%

40%

60%

80%

100%

Injected pharynx

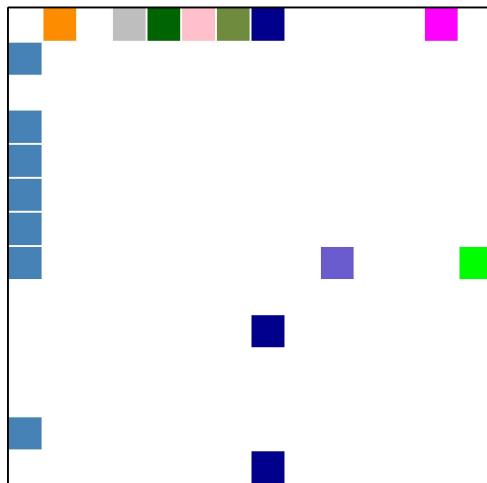

Flu A (pH1N1)

Flu A (H3N2)

Flu A (Unknown)

Flu B

CA/Echo

Entero

Rhino

Adeno E

Adeno B

Corona OC43

Corona NL63

Corona 229E

hMPV

Parainfluenza 3

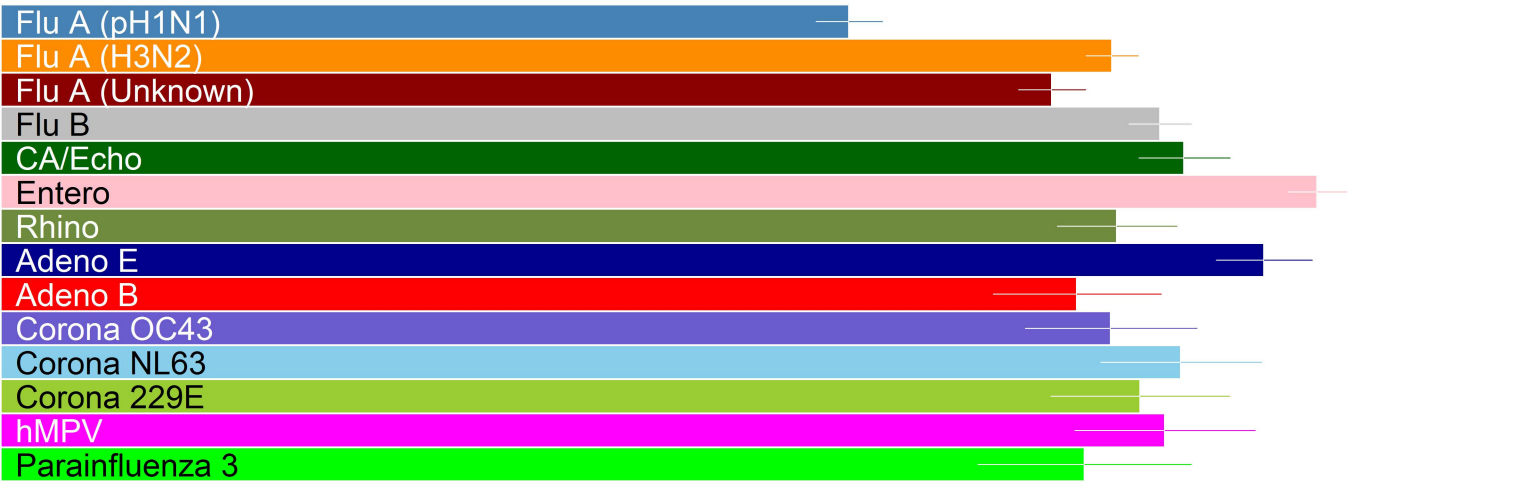

Clinical sign  
or symptom

SM

Proportion, by infection status

0%

20%

40%

60%

80%

100%

Bodyache

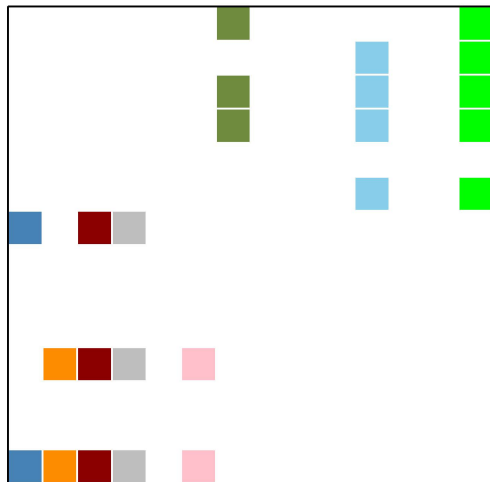

Flu A (pH1N1)

Flu A (H3N2)

Flu A (Unknown)

Flu B

CA/Echo

Entero

Rhino

Adeno E

Adeno B

Corona OC43

Corona NL63

Corona 229E

hMPV

Parainfluenza 3

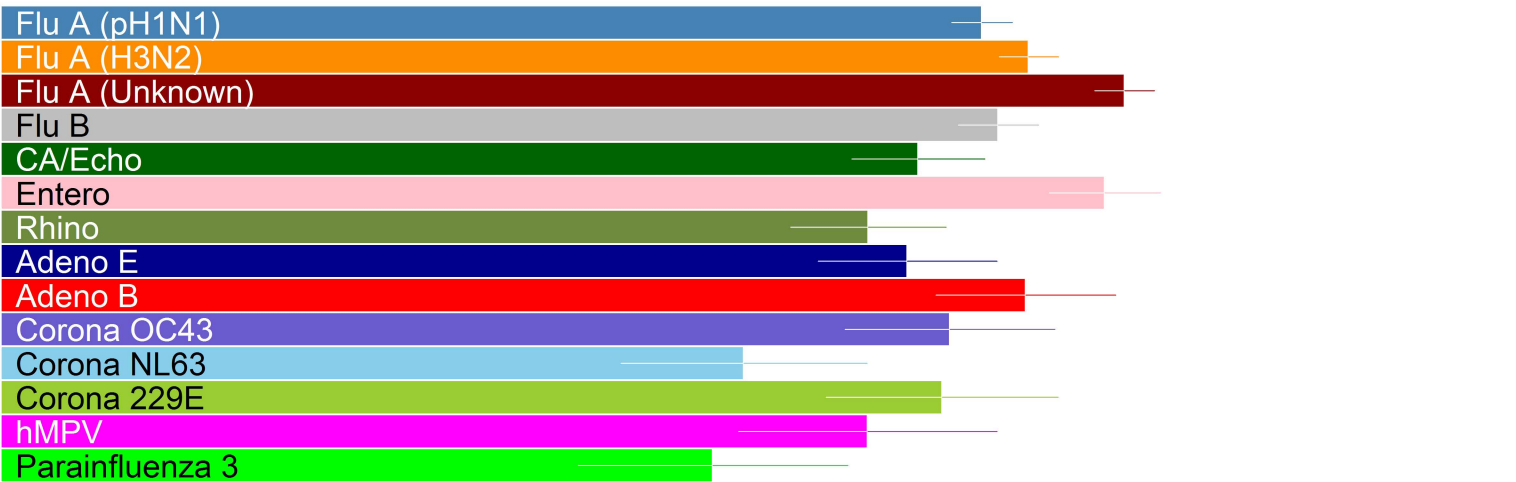

Clinical sign  
or symptom

SM

Proportion, by infection status

0%

20%

40%

60%

80%

100%

Cough with phelgm

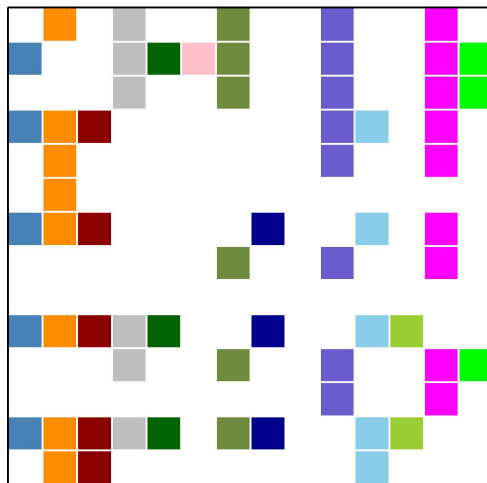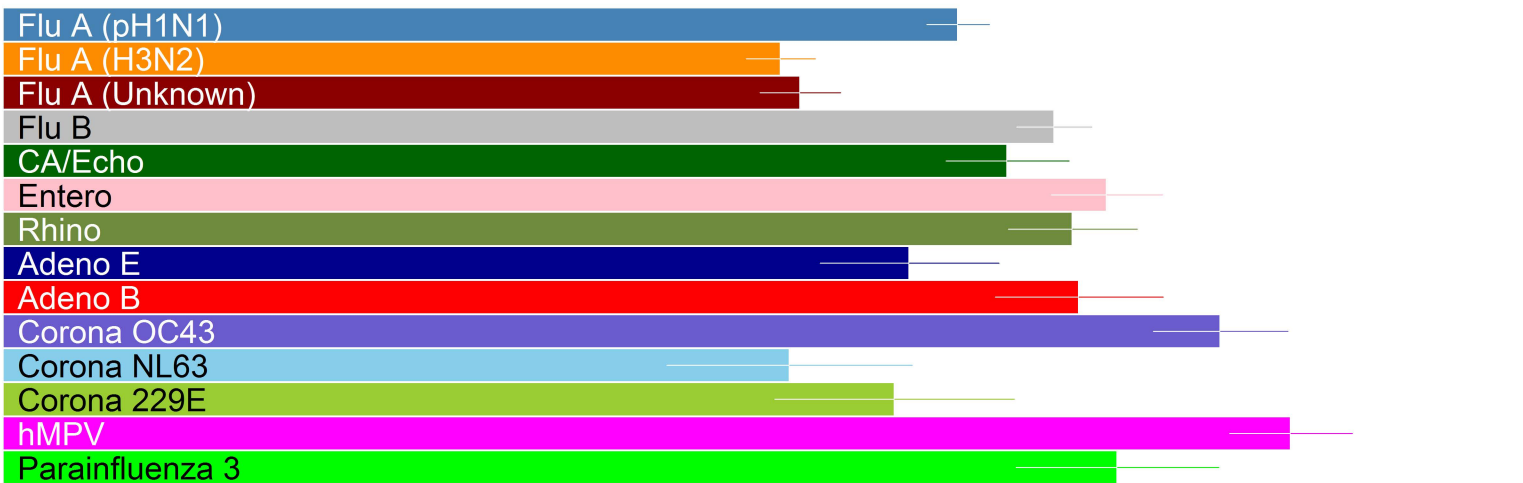

Clinical sign  
or symptom

SM

Proportion, by infection status

0%

20%

40%

60%

80%

100%

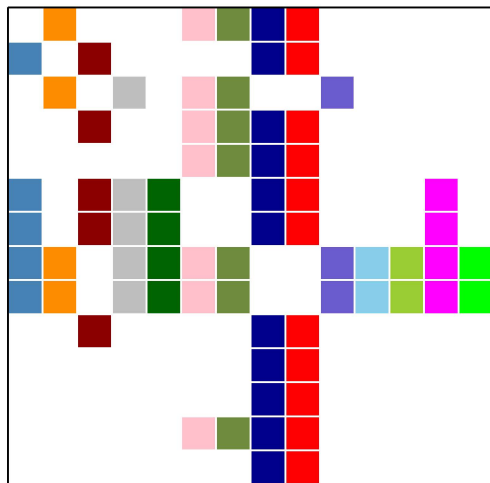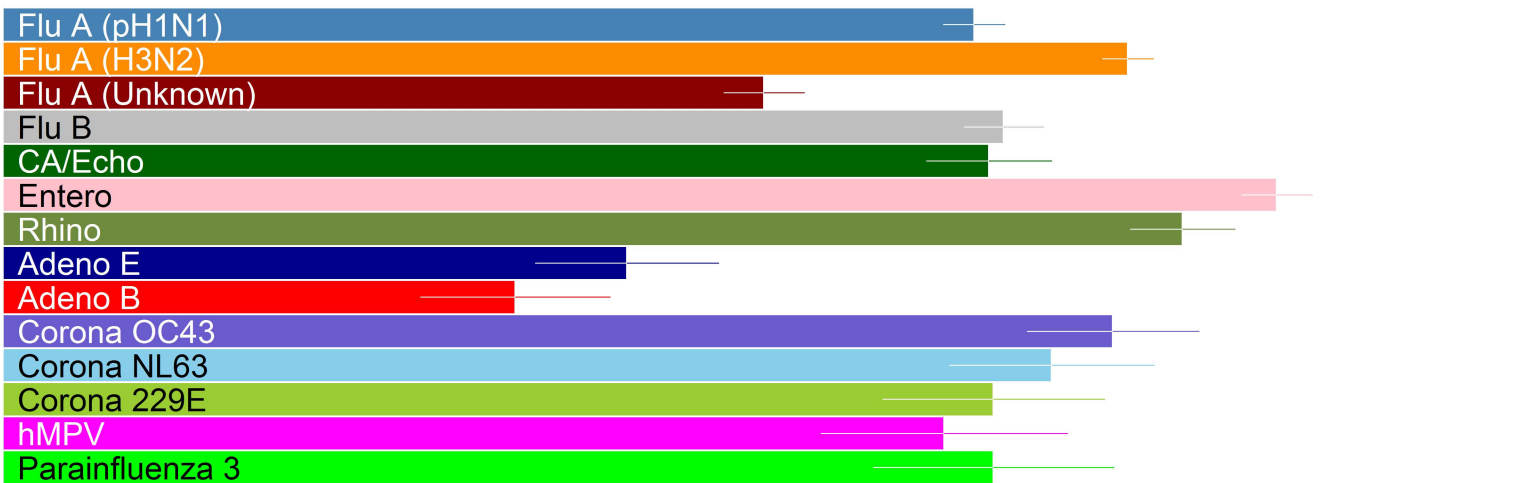

Running nose



Clinical sign  
or symptom

SM

Proportion, by infection status

0%

20%

40%

60%

80%

100%

Blocked nose

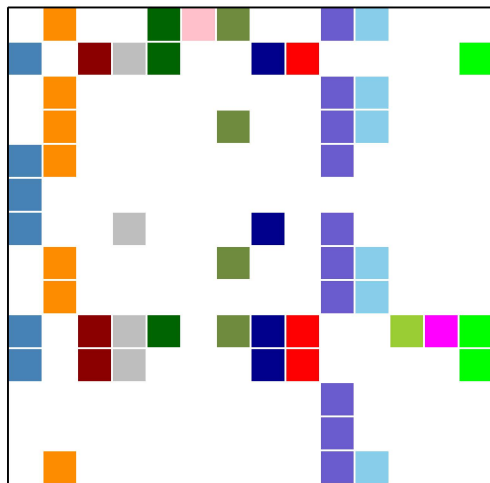

Flu A (pH1N1)

Flu A (H3N2)

Flu A (Unknown)

Flu B

CA/Echo

Entero

Rhino

Adeno E

Adeno B

Corona OC43

Corona NL63

Corona 229E

hMPV

Parainfluenza 3

Clinical sign  
or symptom

SM

Proportion, by infection status

0%

20%

40%

60%

80%

100%

Fever  $\geq 38^{\circ}\text{C}$

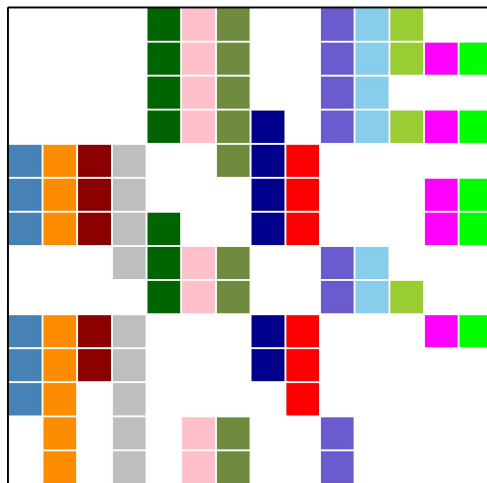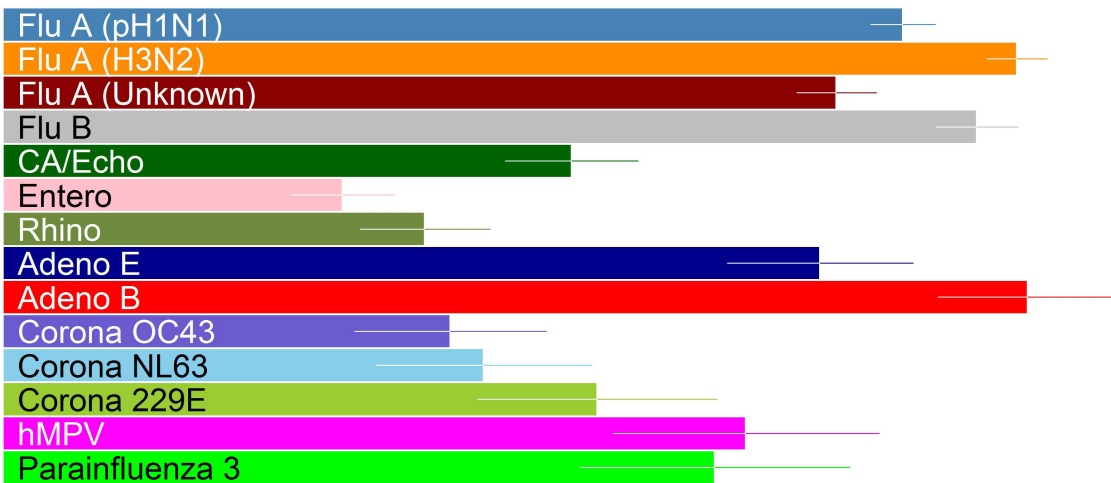

Clinical sign  
or symptom

SM

Proportion, by infection status

0%

20%

40%

60%

80%

100%

Dry cough

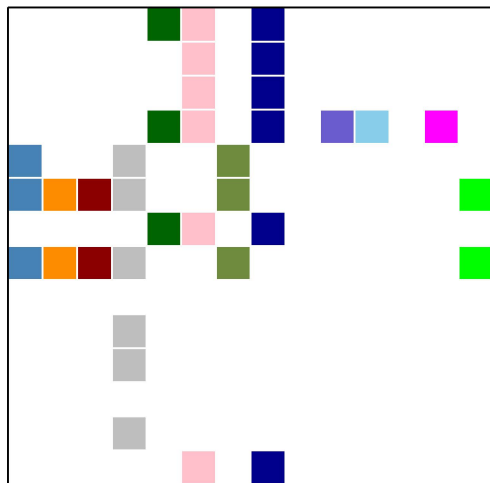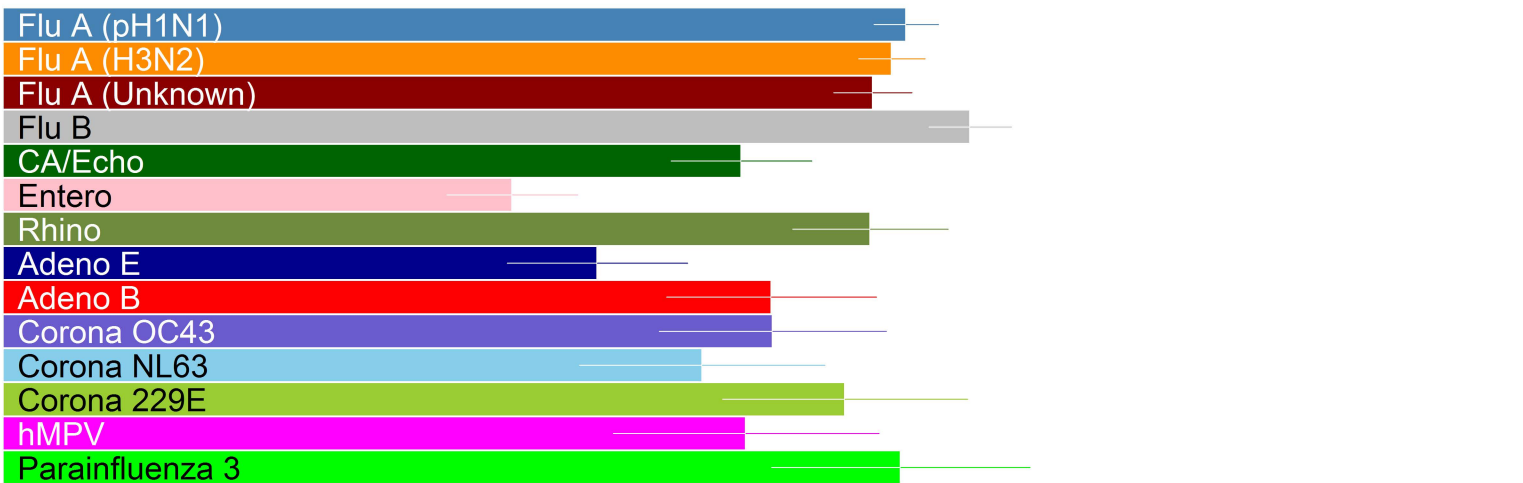

Clinical sign  
or symptom

SM

Proportion, by infection status

0%

20%

40%

60%

80%

100%

Joint pain

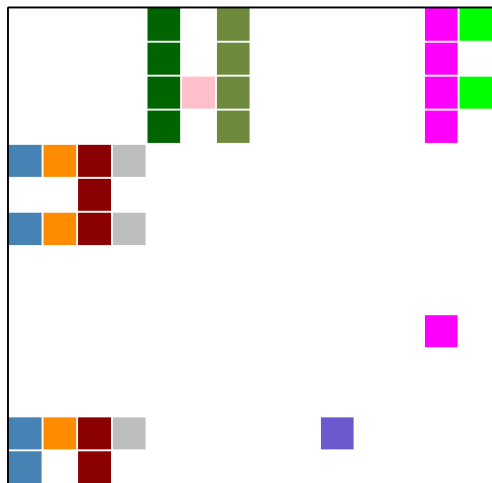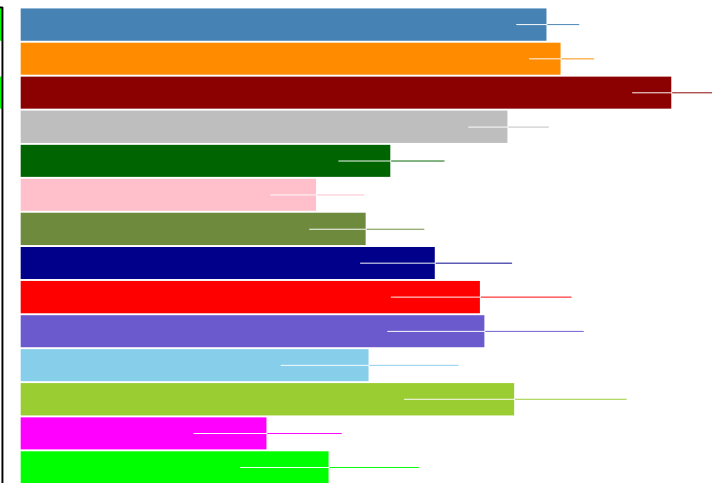

Flu A (pH1N1)  
 Flu A (H3N2)  
 Flu A (Unknown)  
 Flu B  
 CA/Echo  
 Entero  
 Rhino  
 Adeno E  
 Adeno B  
 Corona OC43  
 Corona NL63  
 Corona 229E  
 hMPV  
 Parainfluenza 3

Clinical sign  
or symptom

SM

Proportion, by infection status

0%

20%

40%

60%

80%

100%

Nausea

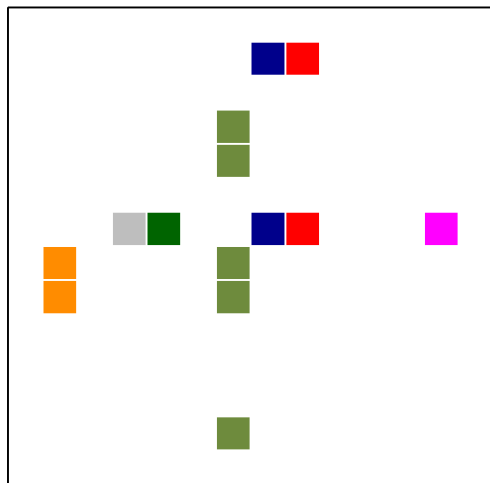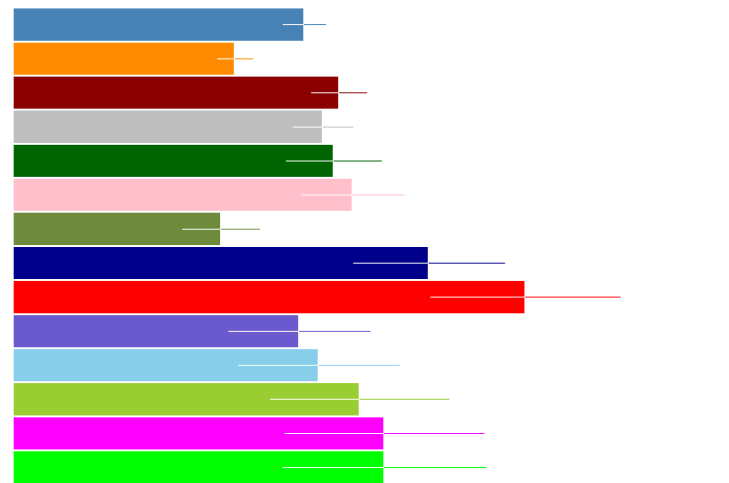

Flu A (pH1N1)  
Flu A (H3N2)  
Flu A (Unknown)  
Flu B  
CA/Echo  
Entero  
Rhino  
Adeno E  
Adeno B  
Corona OC43  
Corona NL63  
Corona 229E  
hMPV  
Parainfluenza 3

Clinical sign  
or symptom

SM

Proportion, by infection status

0%

20%

40%

60%

80%

100%

Eye pain

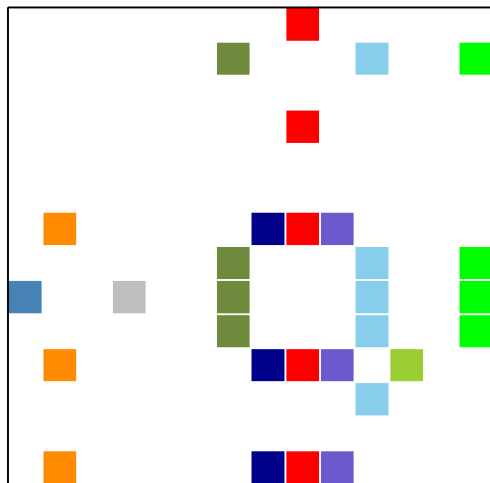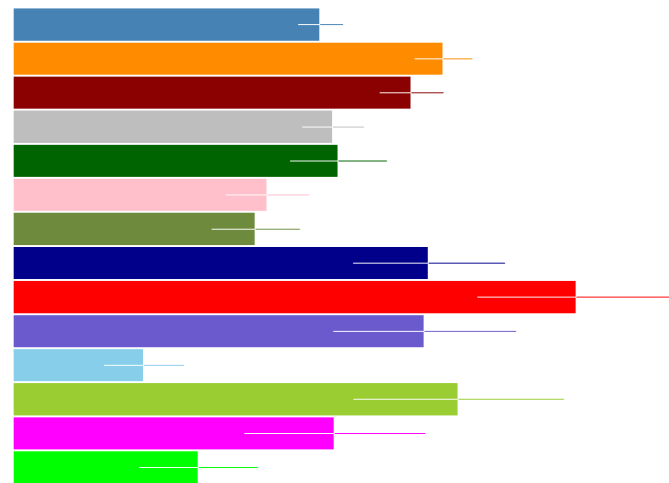

Flu A (pH1N1)  
Flu A (H3N2)  
Flu A (Unknown)  
Flu B  
CA/Echo  
Entero  
Rhino  
Adeno E  
Adeno B  
Corona OC43  
Corona NL63  
Corona 229E  
hMPV  
Parainfluenza 3
